# Supplementary material for: Palladium and copper-catalyzed ligand-free coupling of phenylhydrazines in water
Source: Royal Society of Chemistry journal article supplement (doi:10.1039/c4ra04621h), 2014-01-01
Supplement: c4ra04621h1.pdf [file c4ra04621h1.pdf]

## Supporting Information

### **Palladium and copper-catalyzed ligand-free coupling of phenylhydrazines in water**

Parul Chauhan,<sup>‡a</sup> Makthala Ravi,<sup>‡a</sup> Shikha Singh,<sup>a</sup> Kanumuri S. R. Raju,<sup>c</sup> Vikas Bajpai,<sup>b</sup> Brijesh Kumar,<sup>b</sup> Wahajuddin,<sup>c</sup> Prem. P. Yadav\*<sup>a</sup>

<sup>a</sup>*Division of Medicinal and Process Chemistry, CSIR-Central Drug Research Institute, Lucknow-226031, India*

<sup>b</sup>*Sophisticated Analytical Instrument Facility, CSIR-Central Drug Research Institute, Lucknow-226031, India*

<sup>c</sup>*Division of Pharmacokinetics and Metabolism, CSIR-Central Drug Research Institute, Lucknow-226031, India.*

| <b>Contents:</b>                                                | <b>Page No.</b> |
|-----------------------------------------------------------------|-----------------|
| <b>General Details</b>                                          | <b>3</b>        |
| <b>General experimental procedure and Characterization Data</b> | <b>3-7</b>      |
| <b>Copies of <sup>1</sup>H and <sup>13</sup>C NMR spectra</b>   | <b>8-27</b>     |

## General Experimental Details:

All glass apparatus were oven dried prior to use. Melting points were determined in open capillary tubes on an electrically heated block and are uncorrected. IR spectra were recorded on a Perkin-Elmer FT-IR RX1 spectrophotometer.  $^1\text{H}$  NMR and  $^{13}\text{C}$  NMR spectra were recorded on Bruker DRX-300 and Bruker Ascend-400 using  $\text{CDCl}_3$  as solvent and tetramethylsilane as internal reference. Direct Analysis in Real Time Mass spectrometry (DARTMS) was obtained on JMS-T100LC, AccuTOF. Column chromatography was performed over silica gel (60-120 Mesh) by using Smart flash EPCLC AI-700X YAMAZEN with minimal amount of solvent. HPLC analyses was carried out using system consists of Shimadzu LC-10ATVp pumps and SIL-HTc auto sampler with temperature controller on a Zorbax SB100 C18 column ( $4.6 \times 150$  mm,  $5.0 \mu\text{m}$ ). The system was run in gradient mode with mobile phase consisting of acetonitrile (A) and water (B) at a flow rate of 0.80 mL/min. Data acquisition was carried out on Class Vp software. All chemicals and reagents were obtained from Aldrich (USA), Alfa Aesar (England) and used without further purification. All reactions were performed in a 25 ml RB flask equipped with a guard tube and reaction mixture was stirred at 600 rpm at rt for the duration of reaction.

### Representative procedure for the synthesis of 4,4'-difluorobiphenyl (2a):

To a solution of phenylhydrazine **1a** (100 mg, 0.62 mmol) in water (10 mL) added  $\text{Pd}(\text{TFA})_2$  (5.1 mg, 0.015 mmol) and  $\text{Cu}(\text{OAc})_2$  (11.2 mg, 0.062 mmol) and stirred the reaction mixture at rt for 15 min. The reaction mixture was extracted with ethyl acetate. The organic layer was dried over anhydrous  $\text{Na}_2\text{SO}_4$  and the solvent was removed under reduced pressure to give the crude product. Crude product was further purified by column chromatography over silica gel using 100% hexane as eluent to furnish 53mg (90%) of **2a** as white solid.

### Representative procedure for the synthesis of 4-fluoro-4'-methoxybiphenyl (3c):

To a solution of phenylhydrazine **1a** (110mg, 0.68 mmol) and phenylhydrazine **1h** (100mg, 0.57 mmol) in water (10 mL) added  $\text{Pd}(\text{TFA})_2$  (4.7 mg, 0.014 mmol) and  $\text{Cu}(\text{OAc})_2$  (10.3mg, 0.057 mmol) and stirred the reaction mixture at rt for 2 h. The reaction mixture was extracted with ethyl acetate. The organic layer was dried over anhydrous  $\text{Na}_2\text{SO}_4$  and the solvent was removed under reduced pressure to give the crude product. Crude product was further purified by column chromatography over silica gel using 100% hexane as eluent. Quantitative yields of cross coupling products were carried out using system consists of Shimadzu LC-10ATVp pumps and SIL-HTc auto sampler with temperature controller to give 71% of **3c**, 13% of **2a** and 15% of **2h** by using Zorbax SB100 C18 column ( $4.6 \times 150$  mm,  $5.0 \mu\text{m}$ ) eluted with gradient of  $\text{H}_2\text{O}$ :Acetonitrile.

### Representative procedure for the synthesis of 4-chloro-4'-methoxybiphenyl (3a):

To a solution of 4-Chlorophenylhydrazine hydrochloride **1c** (100mg, 0.56 mmol) and 4-Methoxyphenylboronic acid **6** (100mg, 0.66 mmol) in water (10 mL) added Pd(TFA)<sub>2</sub> (3.3 mg, 0.010 mmol) and Cu(OAc)<sub>2</sub> (10.8mg, 0.06 mmol) and stirred the reaction mixture at rt for 6 h. The reaction mixture was extracted with ethyl acetate. The organic layer was dried over anhydrous Na<sub>2</sub>SO<sub>4</sub> and the solvent was removed under reduced pressure to give the crude product. Crude product was further purified by column chromatography over silica gel using 100% hexane as eluent and to furnish 62.3mg (51%) of **3a** as white solid, 17mg (28%) of **2c** as white solid and 12.5mg (18 %) of **2h** as white solid.

## Compound Characterization Data:

### 4,4'-difluorobiphenyl (**2a**)<sup>1</sup>

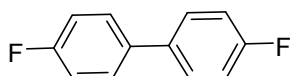

White solid, Yield 90%, mp 78-81°C, lit<sup>1</sup> mp 88-90°C; **FT-IR** (KBr,  $\nu_{\max}/\text{cm}^{-1}$ ) 3021, 1601, 1497, 928; **<sup>1</sup>H NMR** (400 MHz, CDCl<sub>3</sub>)  $\delta$  7.10-7.14 (4H, m), 7.47-7.51 (4H, m); **<sup>13</sup>C NMR** (75 MHz, CDCl<sub>3</sub>)  $\delta$  115.9 (d,  $J$  = 21.37 Hz, 4×CH), 128.8 (d,  $J$  = 8.0 Hz, 4×CH), 136.6 (d,  $J$  = 2.95 Hz, 2×C), 164.2 (d,  $J$  = 244.93 Hz, 2×C-F); **HRMS (DART)**  $m/z$  calcd for C<sub>12</sub>H<sub>8</sub>F<sub>2</sub> (M)<sup>+</sup> 190.0594, found 190.0603.

### 4,4'-dibromobiphenyl (**2b**)<sup>1</sup>

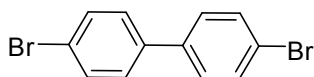

White solid, Yield 85%, mp 158-162°C, lit<sup>1</sup> mp 162-164°C, ; **FT-IR** (KBr,  $\nu_{\max}/\text{cm}^{-1}$ ) 3021, 1634, 1473, 928; **<sup>1</sup>H NMR** (400 MHz, CDCl<sub>3</sub>)  $\delta$  7.40-7.43 (4H, m), 7.55-7.58 (4H, m); **<sup>13</sup>C NMR** (100 MHz, CDCl<sub>3</sub>)  $\delta$  122.1 (2×C), 128.6 (4×CH), 132.2 (4×CH), 139.0 (2×C); **HRMS (DART)**  $m/z$  calcd for C<sub>12</sub>H<sub>8</sub>Br<sub>2</sub> (M)<sup>+</sup> 309.8992, found 309.9020.

### 4,4'-dichlorobiphenyl (**2c**)<sup>1</sup>

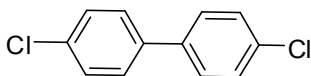

White solid, Yield 90%, mp 142-145°C, lit<sup>1</sup> mp 148-150°C; **FT-IR** (KBr,  $\nu_{\max}/\text{cm}^{-1}$ ) 3021, 1634, 1478, 928; **<sup>1</sup>H NMR** (400 MHz, CDCl<sub>3</sub>)  $\delta$  7.40-7.42 (4H, m), 7.46-7.49 (4H, m); **<sup>13</sup>C NMR** (75 MHz, CDCl<sub>3</sub>)  $\delta$  128.3 (4×CH), 129.2 (4×CH), 133.9 (2×C), 138.5 (2×C); **HRMS (DART)**  $m/z$  calcd for C<sub>12</sub>H<sub>8</sub>Cl<sub>2</sub> (M)<sup>+</sup> 222.0003, found 221.9995.

### Biphenyl (**2d**)<sup>1</sup>

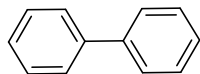

White solid, Yield 82%, mp 65-68°C, lit<sup>1</sup> mp 68-70°C; **FT-IR** (KBr,  $\nu_{\max}/\text{cm}^{-1}$ ) 3021, 1631, 1521, 927; **<sup>1</sup>H NMR** (400 MHz, CDCl<sub>3</sub>)  $\delta$  7.36 (2H, t,  $J = 6.9$  Hz), 7.45 (4H, t,  $J = 7.5$  Hz), 7.61 (4H, d,  $J = 8$  Hz); **<sup>13</sup>C NMR** (100 MHz, CDCl<sub>3</sub>)  $\delta$  127.3 (4×CH), 127.4 (2×CH), 128.9 (4×CH), 141.4 (2×C), **HRMS** (DART)  $m/z$  calcd for C<sub>12</sub>H<sub>10</sub> (M)<sup>+</sup> 154.0783, found 154.0786.

### Biphenyl-4,4'-dicarbonitrile (2e)<sup>1</sup>

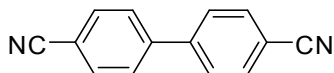

Light Yellow solid, Yield 69%, mp 223-225°C, lit<sup>1</sup> mp 235-237°C; **FT-IR** (KBr,  $\nu_{\max}/\text{cm}^{-1}$ ) 3019, 2231, 1605, 1493, 928; **<sup>1</sup>H NMR** (400 MHz, CDCl<sub>3</sub>)  $\delta$  7.69 (4H, d,  $J = 8.5$  Hz) 7.78 (4H, d,  $J = 8.4$  Hz). **<sup>13</sup>C NMR** (100 MHz, CDCl<sub>3</sub>)  $\delta$  112.5 (2×C), 118.5 (2×C), 128.1 (4×CH), 133.0 (4×CH), 143.6 (2×C); **HRMS** (DART)  $m/z$  calcd for C<sub>14</sub>H<sub>9</sub>N<sub>2</sub> (M+H)<sup>+</sup> 205.0766, found 205.0766.

### 4,4'-dinitrobiphenyl (2f)<sup>2</sup>

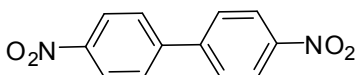

White solid, Yield 81%, mp 236-240°C, lit<sup>2</sup> mp 235°C; **FT-IR** (KBr,  $\nu_{\max}/\text{cm}^{-1}$ ) 3019, 1638, 1480, 928; **<sup>1</sup>H NMR** (400 MHz, CDCl<sub>3</sub>)  $\delta$  7.79 (4H, d,  $J = 8.7$  Hz), 8.36 (4H, d,  $J = 8.7$  Hz); **<sup>13</sup>C NMR** (75 MHz, CDCl<sub>3</sub>)  $\delta$  124.5 (4×CH), 128.5 (4×CH), 145.1 (2×C), 148.2 (2×C); **HRMS** (DART)  $m/z$  calcd for C<sub>12</sub>H<sub>9</sub>N<sub>2</sub>O<sub>4</sub> (M+H)<sup>+</sup> 245.0562, found 245.0564.

### 3,3,4,4'-tetrachlorobiphenyl (2g)<sup>3</sup>

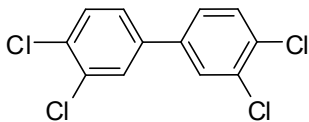

White solid, Yield 79%, mp 165-168°C, lit<sup>3</sup> mp 175-177°C; **FT-IR** (KBr,  $\nu_{\max}/\text{cm}^{-1}$ ) 3019, 1635, 1545, 928; **<sup>1</sup>H NMR** (400 MHz, CDCl<sub>3</sub>)  $\delta$  7.35-7.37 (2H, dd,  $J = 8.3, 2.1$  Hz), 7.51-7.53 (2H, m), 7.62 (2H, d,  $J = 2.1$  Hz); **<sup>13</sup>C NMR** (100 MHz, CDCl<sub>3</sub>)  $\delta$  126.3 (2×CH), 128.9 (2×CH), 131.1 (2×CH), 132.6 (2×C), 133.4 (2×C), 138.9 (2×C); **HRMS** (DART)  $m/z$  calcd for C<sub>12</sub>H<sub>6</sub>Cl<sub>4</sub> (M)<sup>+</sup> 289.9223, found 289.9207.

### 4,4'-dimethoxybiphenyl (2h)<sup>1</sup>

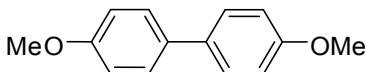

White solid, Yield 68%, mp 165-168°C, lit<sup>1</sup> mp 172-174°C; **FT-IR** (KBr,  $\nu_{\max}/\text{cm}^{-1}$ ) 3021, 1610, 1499, 928; **<sup>1</sup>H NMR** (400 MHz, CDCl<sub>3</sub>)  $\delta$  3.85 (6H, s), 6.95-6.97 (4H, m), 7.47-7.49 (4H, m); **<sup>13</sup>C NMR** (75 MHz, CDCl<sub>3</sub>),  $\delta$  55.5 (2×CH<sub>3</sub>), 114.3 (4×CH), 127.9 (4×CH), 133.6 (2×C), 158.8 (2×C), **HRMS** (DART)  $m/z$  calcd for C<sub>14</sub>H<sub>15</sub>O<sub>2</sub> (M+H)<sup>+</sup> 215.1072, found 215.1075.

### 3,3,4,4'-tetramethylbiphenyl (2i)<sup>1</sup>

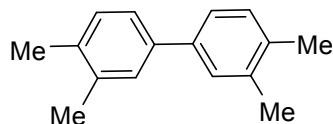

White solid, Yield 80%, mp 68-70°C, lit<sup>1</sup> mp 72-74°C; **FT-IR** (KBr,  $\nu_{\max}/\text{cm}^{-1}$ ) 3019, 1637, 1495, 928; **<sup>1</sup>H NMR** (400 MHz, CDCl<sub>3</sub>)  $\delta$  2.31 (6H, s), 2.34 (6H, s), 7.19 (2H, d,  $J = 7.7$  Hz), 7.33 (2H, d,  $J = 7.8$  Hz), 7.37 (2H, s); **<sup>13</sup>C NMR** (100 MHz, CDCl<sub>3</sub>),  $\delta$  19.5 (2×CH<sub>3</sub>), 20.0 (2×CH<sub>3</sub>), 124.5 (2×CH), 128.4 (2×CH), 130.1 (2×CH), 135.4 (2×C), 136.9 (2×C), 139.0 (2×C); **HRMS** (DART)  $m/z$  calcd for C<sub>16</sub>H<sub>19</sub> (M+H)<sup>+</sup> 211.1487, found 211.1480.

### 7,7'-dichloro-4,4'-biquinoline (2j)

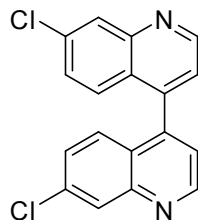

Brown solid, Yield 45%, mp 168-170°C; **FT-IR** (KBr,  $\nu_{\max}/\text{cm}^{-1}$ ) 3020, 1605, 1492, 878; **<sup>1</sup>H NMR** (400 MHz, CDCl<sub>3</sub>)  $\delta$  7.23 (2H, d,  $J = 3.8$  Hz), 7.34-7.37 (4H, m), 8.21 (2H, t,  $J = 2.04$  Hz), 9.04 (2H, s); **<sup>13</sup>C NMR** (100 MHz, CDCl<sub>3</sub>)  $\delta$  121.9 (2×CH), 125.1 (2×C), 126.8 (2×CH), 128.4 (2×CH), 128.9 (2×CH), 136.0 (2×C), 143.8 (2×C), 148.8 (2×C), 150.9 (2×CH), **HRMS** (ESI)  $m/z$  calcd for C<sub>18</sub>H<sub>10</sub>Cl<sub>2</sub>N<sub>2</sub> (M+H)<sup>+</sup> 325.0297, found 325.0299.

### 4-chloro-4'-methoxybiphenyl (3a)<sup>4</sup>

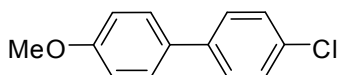

White solid, Yield 76%, mp 105-107°C, lit<sup>4</sup> mp 115-116.4°C; **FT-IR** (KBr,  $\nu_{\max}/\text{cm}^{-1}$ ) 3021, 1611, 1485, 928; **<sup>1</sup>H NMR** (400 MHz, CDCl<sub>3</sub>)  $\delta$  3.85 (3H, s), 6.96-6.99 (2H, m), 7.37-7.39 (2H, m), 7.46-7.50 (4H, m); **<sup>13</sup>C NMR** (100 MHz, CDCl<sub>3</sub>)  $\delta$  55.5 (CH<sub>3</sub>), 114.5 (2×CH), 128.1 (2×CH), 128.2 (2×CH), 128.9 (2×CH), 132.6 (C), 132.8 (C), 139.4 (C), 159.5 (C); **HRMS** (DART)  $m/z$  calcd for C<sub>13</sub>H<sub>11</sub>ClO (M)<sup>+</sup> 218.0498, found 218.0512;

### 4-bromo-4'-methoxybiphenyl (3b)<sup>5</sup>

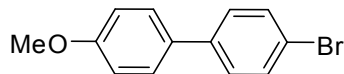

White solid, Yield 75%, mp 136-140°C, lit<sup>5</sup> 143-145°C; **FT-IR** (KBr,  $\nu_{\max}/\text{cm}^{-1}$ ) 3021, 1612, 1481, 928; **<sup>1</sup>H NMR** (400 MHz, CDCl<sub>3</sub>)  $\delta$  3.85 (3H, s), 6.96-6.98 (2H, m), 7.40-7.42 (2H, m), 7.47-7.54 (4H, m); **<sup>13</sup>C NMR** (100MHz, CDCl<sub>3</sub>),  $\delta$  55.5 (CH<sub>3</sub>), 114.5 (2×CH), 120.9 (C), 128.1 (2×CH), 128.4 (2×CH), 131.9 (2×CH), 132.6 (C), 139.9 (C), 159.6 (C); **HRMS** (DART)  $m/z$  calcd for C<sub>13</sub>H<sub>12</sub>BrO (M+H)<sup>+</sup> 263.0072, found 263.0064;

#### 4-fluoro-4'-methoxybiphenyl (3c)<sup>6</sup>

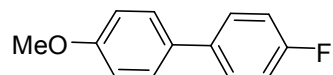

White solid, Yield 71%, mp 90-94°C, lit<sup>6</sup> mp 84-86°C; **FT-IR** (KBr,  $\nu_{\max}/\text{cm}^{-1}$ ) 3021, 1611, 1500, 928; **<sup>1</sup>H NMR** (400 MHz, CDCl<sub>3</sub>)  $\delta$  3.85 (3H, s), 6.95-6.99 (2H, m), 7.07-7.13 (2H, m), 7.45-7.52 (4H, m); **<sup>13</sup>C NMR** (100 MHz, CDCl<sub>3</sub>),  $\delta$  55.4 (CH<sub>3</sub>), 114.3 (2×CH), 115.6 (d,  $J= 21.22$  Hz, 2×CH), 128.0 (2×CH), 128.3 (d,  $J= 7.86$  Hz, 2×CH), 132.9 (C), 137.0 (C), 159.1 (C), 163.3 (d,  $J= 243.84$  Hz, C-F); **HRMS** (DART)  $m/z$  calcd for C<sub>13</sub>H<sub>12</sub>FO (M+H)<sup>+</sup> 203.0872, found 203.0867.

#### 4'-methoxybiphenyl-4-carbonitrile (3d)<sup>4</sup>

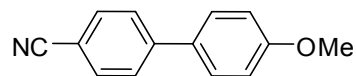

White solid, Yield 41%, mp 97-99°C, lit<sup>4</sup> mp 114.115.4°C; **FT-IR** (KBr,  $\nu_{\max}/\text{cm}^{-1}$ ) 3019, 2228, 1606, 1495, 928; **<sup>1</sup>H NMR** (400 MHz, CDCl<sub>3</sub>)  $\delta$  3.87 (3H, s), 6.99-7.02 (2H, m), 7.52-7.56 (2H, m), 7.62-7.65 (2H, m), 7.68-7.71 (2H, m); **<sup>13</sup>C NMR** (100 MHz, CDCl<sub>3</sub>),  $\delta$  55.5 (CH<sub>3</sub>), 110.2 (C), 114.7 (2×CH), 119.2 (C), 127.2 (2×CH), 128.5 (2×CH), 131.6 (C), 132.7 (2×CH), 145.4 (C), 160.3 (C); **HRMS** (DART)  $m/z$  calcd for C<sub>14</sub>H<sub>12</sub>NO (M+H)<sup>+</sup> 210.0919, found 210.0918.

#### 4'-chlorobiphenyl-4-carbonitrile (3e)<sup>4</sup>

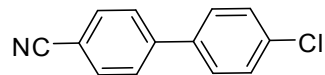

White solid, Yield 59%, mp 117-120°C, lit<sup>4</sup> mp 124-125°C; **FT-IR** (KBr,  $\nu_{\max}/\text{cm}^{-1}$ ) 3020, 2230 1637, 1485, 929; **<sup>1</sup>H NMR** (400 MHz, CDCl<sub>3</sub>)  $\delta$  7.44-7.47 (2H, m), 7.50-7.54 (2H, m), 7.63-7.66 (2H, m), 7.72-7.74 (2H, m); **<sup>13</sup>C NMR** (100 MHz, CDCl<sub>3</sub>)  $\delta$  111.4 (C), 118.9 (C), 127.7 (2×CH), 128.6 (2×CH), 129.5 (2×CH), 132.8 (2×CH), 135.1 (C), 137.7 (C), 144.5 (C); **HRMS** (DART)  $m/z$  calcd for C<sub>13</sub>H<sub>9</sub>ClN (M+H)<sup>+</sup> 214.0424, found 214.0427.

#### 4'-bromobiphenyl-4-carbonitrile (3f)<sup>7</sup>

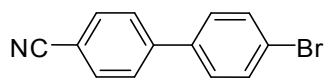

White solid, Yield 64%, mp 116-118°C, lit<sup>7</sup> mp 115-115.5°C; **FT-IR** (KBr,  $\nu_{\max}/\text{cm}^{-1}$ ) 3021, 2230, 1610, 1482, 928; **<sup>1</sup>H NMR** (400 MHz, CDCl<sub>3</sub>)  $\delta$  7.44-7.47 (2H, m), 7.60-7.67 (4H, m), 7.72-7.74 (2H, m); **<sup>13</sup>C NMR** (100 MHz, CDCl<sub>3</sub>)  $\delta$  111.5 (C), 118.9 (C), 123.3 (C), 127.7 (2×CH), 128.9 (2×CH), 132.4 (2×CH), 132.8 (2×CH), 138.2 (C), 144.6 (C); **HRMS** (DART)  $m/z$  calcd for C<sub>13</sub>H<sub>9</sub>BrN (M+H)<sup>+</sup> 257.9918, found 257.9926.

### 2-(4-fluorophenyl)benzo[d]thiazole (5)<sup>8</sup>

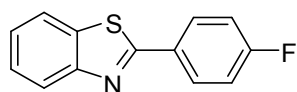

Off yellow solid, Yield 47%, mp 95-98°C, lit<sup>8</sup> mp 98-100°C; **FT-IR** (KBr,  $\nu_{\max}/\text{cm}^{-1}$ ) 3019, 1607, 1485, 839; **<sup>1</sup>H NMR** (400 MHz, CDCl<sub>3</sub>)  $\delta$  7.17-7.21 (2H, m), 7.39 (1H, td,  $J = 8.24, 1.08$ ), 7.50 (1H, td,  $J = 8.24, 1.2$ ), 7.91 (1H, d,  $J = 7.96$ ), 8.05-8.12 (3H, m); **<sup>13</sup>C NMR** (100 MHz, CDCl<sub>3</sub>)  $\delta$  116.3 (d,  $J = 21.99$ , 2XCH), 121.6 (CH), 123.2 (CH), 125.3 (CH), 126.4 (CH), 129.6 (d,  $J = 8.6$  Hz, 2XCH), 130.0 (C), 135.1 (C), 154.1 (C), 165.8 (d,  $J = 251.0$  Hz, C-F), 166.8 (C); **HRMS** (ESI)  $m/z$  calcd for C<sub>13</sub>H<sub>8</sub>FNS (M+H)<sup>+</sup> 230.0439, found 230.0440..

#### References:

1. P. Puthiaraj, P. Suresh and K. Pitchumani, *Green Chem.*, 2014, **16**, 2865.
2. D.D. Hennings, T. Iwama and V.H. Rawal, *Org. Lett.*, 1999, **1**, 1205
3. S. Nerdinger, C. Kendall, X. Cai, R. Marchart, P. Riebel, M.R. Johnson, C.F. Yin, N. Henaff, L.D. Elitis and V. Snieckus, *J. Org. Chem.*, 2007, **72**, 5960.
4. S. Cacchi, E. Caponetti, M. A. Casadei, A. D. Giulio, G. Fabrizi, G. Forte, A. Goggiamani, S. Moreno, P. Paolicelli, F. Petrucci, A. Prastaro and M. L. Saladino, *Green Chem.*, **14**, 317.
5. J. Qiu, L. Wang, M. Liu, Q. Shen and J. Tang, *Tetrahedron Lett.*, 2011, **52**, 6489.
6. H.-P. Zhou, J.-B. Liu, J.-J. Yuan and Y.-Y Peng, *RSC Adv.*, 2014, **4**, 25576.
7. A. A. Farahat, A. Kumar, M. Say, A. E-D. M. Barghash, F. E. Goda, H. M. Eisa, T. Wenzler, R. Brun, Y. Liu, L. Mickelson, W. D. Wilson and D. W. Boykin, *Bioorg. Med. Chem.*, 2010, **18**, 557
8. Y. Gao, Q. Song, G. Cheng and X. Cui, *Org. Biomol. Chem.*, 2014, **12**, 1044.

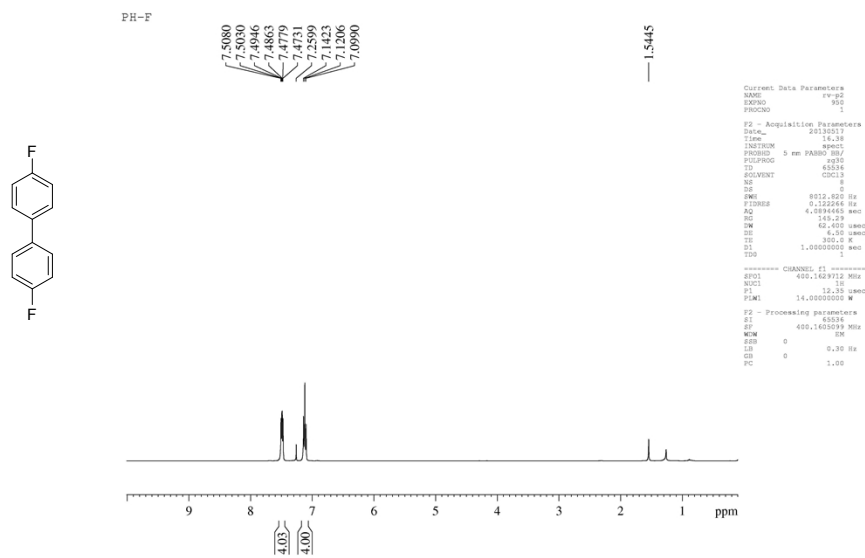

$^1\text{H}$  NMR Spectra of (**2a**) (400 MHz,  $\text{CDCl}_3$ )

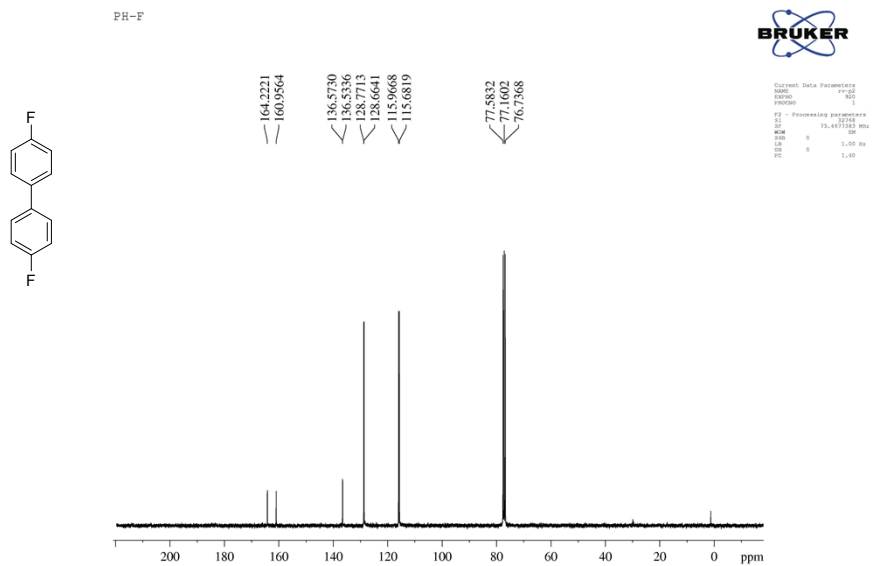

$^{13}\text{C}$  NMR Spectra of (**2a**) (75 MHz,  $\text{CDCl}_3$ )



PH-BR

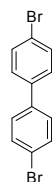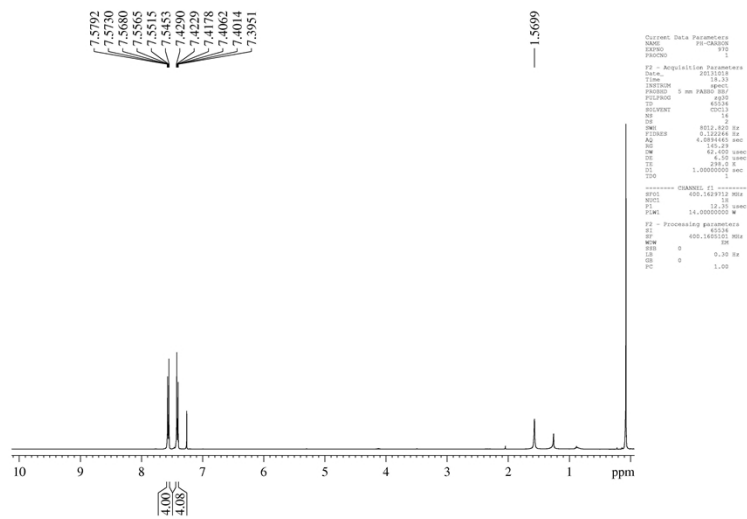

$^1\text{H}$  NMR Spectra of (**2b**) (400 MHz,  $\text{CDCl}_3$ )

PH-BR

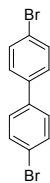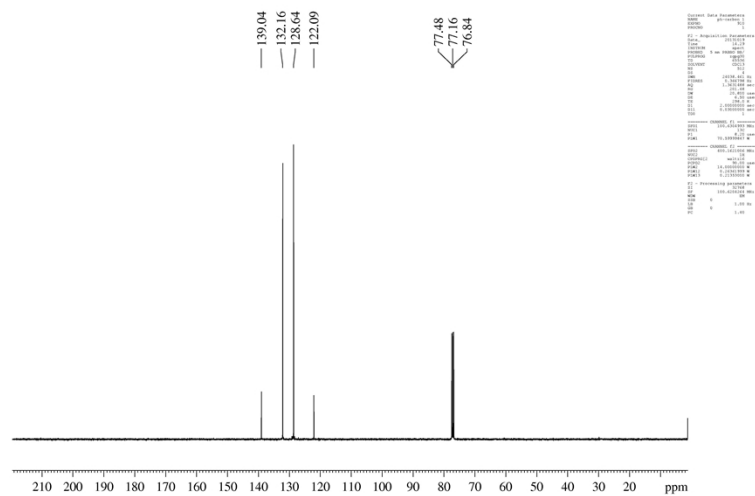

$^{13}\text{C}$  NMR Spectra of (**2b**) (100 MHz,  $\text{CDCl}_3$ )

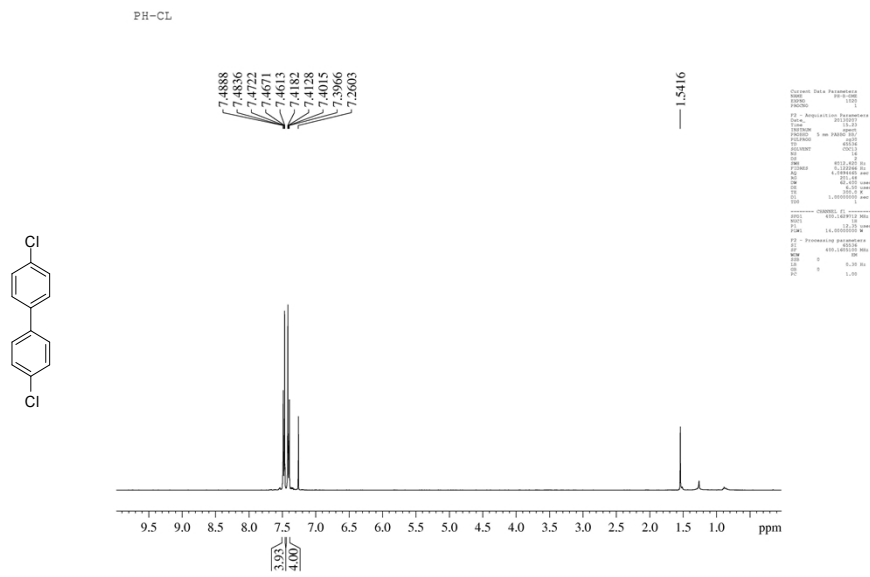

<sup>1</sup>H NMR Spectra of (2c) (400 MHz, CDCl<sub>3</sub>)

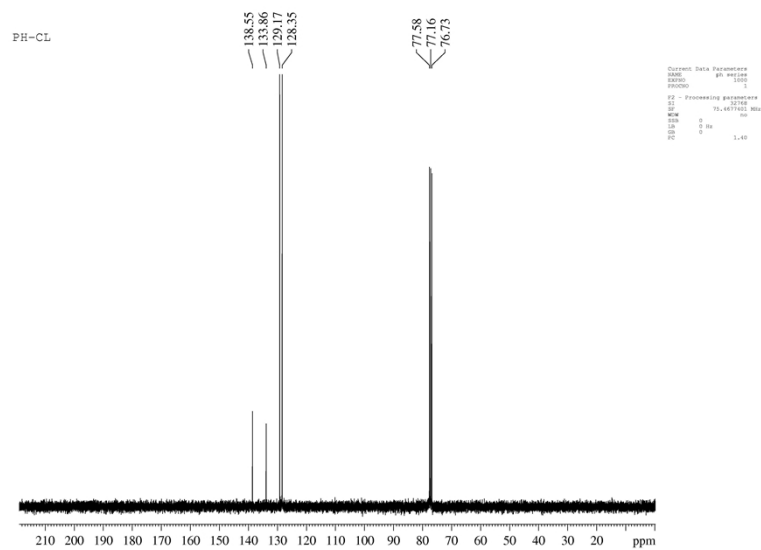

<sup>13</sup>C NMR Spectra of (2c) (75 MHz, CDCl<sub>3</sub>)

PH-N

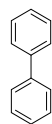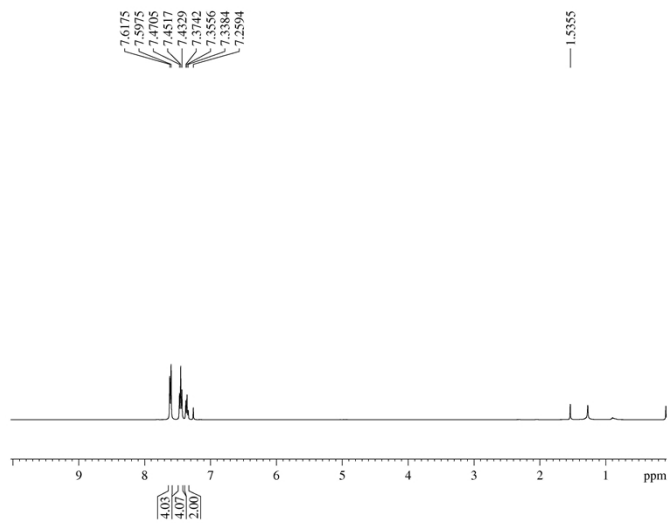

```
Current Data Parameters
NAME: PH-N
EXPNO: 1
PROCNO: 1
PROCPS: 1
SOLVENT: CDCl3
NS: 640
DS: 4
SWH: 10132.00 Hz
FIDRES: 0.1400000 Hz
AQ: 0.7000000 sec
RG: 655.000
AQRES: 0.2000000 Hz
F2 - Acquisition Parameters
NAME: PH-N
EXPNO: 1
PROCNO: 1
PROCPS: 1
SOLVENT: CDCl3
NS: 640
DS: 4
SWH: 10132.00 Hz
FIDRES: 0.1400000 Hz
AQ: 0.7000000 sec
RG: 655.000
AQRES: 0.2000000 Hz
F2 - Processing parameters
NAME: PH-N
EXPNO: 1
PROCNO: 1
PROCPS: 1
SOLVENT: CDCl3
NS: 640
DS: 4
SWH: 10132.00 Hz
FIDRES: 0.1400000 Hz
AQ: 0.7000000 sec
RG: 655.000
AQRES: 0.2000000 Hz
```

<sup>1</sup>H NMR Spectra of (**2d**) (400 MHz, CDCl<sub>3</sub>)

PHN

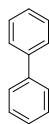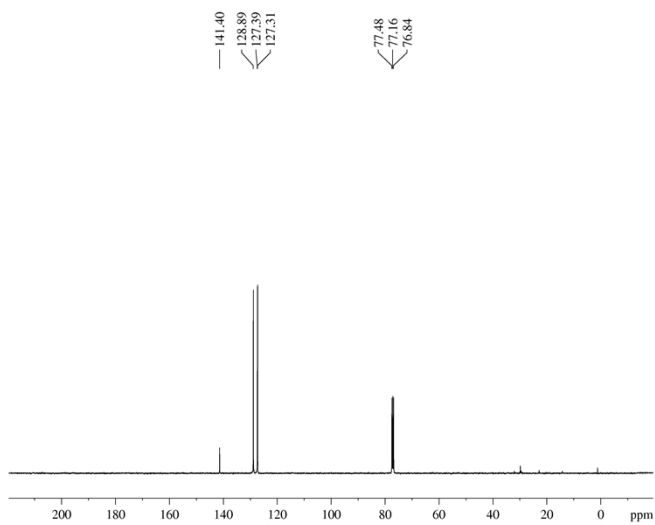

```
Current Data Parameters
NAME: PHN
EXPNO: 1
PROCNO: 1
PROCPS: 1
SOLVENT: CDCl3
NS: 640
DS: 4
SWH: 10132.00 Hz
FIDRES: 0.1400000 Hz
AQ: 0.7000000 sec
RG: 655.000
AQRES: 0.2000000 Hz
F2 - Acquisition Parameters
NAME: PHN
EXPNO: 1
PROCNO: 1
PROCPS: 1
SOLVENT: CDCl3
NS: 640
DS: 4
SWH: 10132.00 Hz
FIDRES: 0.1400000 Hz
AQ: 0.7000000 sec
RG: 655.000
AQRES: 0.2000000 Hz
F2 - Processing parameters
NAME: PHN
EXPNO: 1
PROCNO: 1
PROCPS: 1
SOLVENT: CDCl3
NS: 640
DS: 4
SWH: 10132.00 Hz
FIDRES: 0.1400000 Hz
AQ: 0.7000000 sec
RG: 655.000
AQRES: 0.2000000 Hz
```

<sup>13</sup>C NMR Spectra of (**2d**) (100 MHz, CDCl<sub>3</sub>)

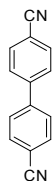

PH-4CN

7.7914  
7.7703  
7.7031  
7.6819  
7.2600

1.5728

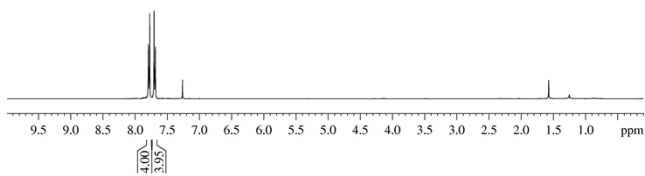

```
Current Data Parameters
NAME: PH-4CN
EXPNO: 1
PROCNO: 1
F2 - Acquisition Parameters
Date_: 20120816
Time: 21.38
INSTRUM: spect
PROBHD: 5 mm PABBO 1H/1
PULPROG: zgpg30
PCPDPRG2:
SOLVENT: CDCl3
NS: 655
DS: 4
SWH: 8012.000 Hz
FIDRES: 0.122284 Hz
AQ: 1.4249164 sec
RG: 512
AQ: 1.4249164 sec
RG: 512
SI: 32768
SF: 400.1463120 MHz
WDW: EM
SSB: 0
LB: 3.00 Hz
GB: 0
PC: 1.00
===== CHANNEL f1 =====
NUC1: 13C
P1: 12.00
PL1: 0.00
===== CHANNEL f2 =====
NUC2: 1H
P2: 1.00
PL2: 0.00
===== CHANNEL f3 =====
NUC3: 13C
P3: 12.00
PL3: 0.00
===== CHANNEL f4 =====
NUC4: 1H
P4: 1.00
PL4: 0.00
F2 - Processing parameters
SI: 32768
SF: 400.1463120 MHz
WDW: EM
SSB: 0
LB: 3.00 Hz
GB: 0
PC: 1.00
```

<sup>1</sup>H NMR Spectra of (2e) (400 MHz, CDCl<sub>3</sub>)

PH-4CN

143.64  
133.01  
128.07  
118.54  
112.55

77.48  
77.16  
76.84

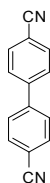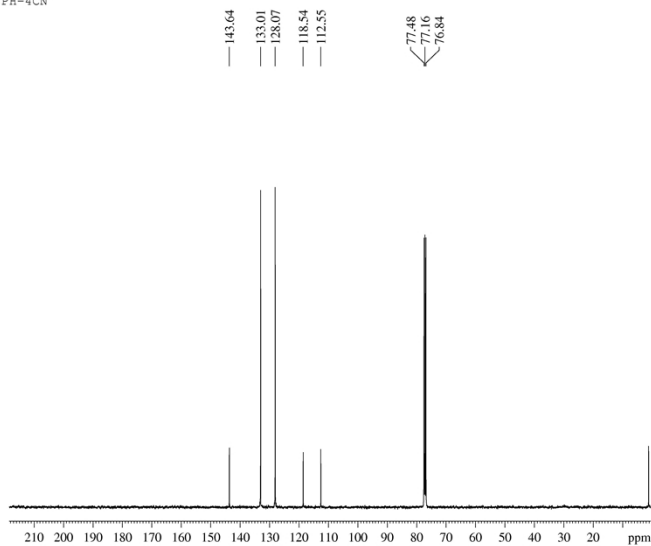

```
Current Data Parameters
NAME: PH-4CN
EXPNO: 1
PROCNO: 1
F2 - Acquisition Parameters
Date_: 20120816
Time: 21.38
INSTRUM: spect
PROBHD: 5 mm PABBO 1H/1
PULPROG: zgpg30
PCPDPRG2:
SOLVENT: CDCl3
NS: 655
DS: 4
SWH: 8012.000 Hz
FIDRES: 0.122284 Hz
AQ: 1.4249164 sec
RG: 512
AQ: 1.4249164 sec
RG: 512
SI: 32768
SF: 400.1463120 MHz
WDW: EM
SSB: 0
LB: 3.00 Hz
GB: 0
PC: 1.00
===== CHANNEL f1 =====
NUC1: 13C
P1: 12.00
PL1: 0.00
===== CHANNEL f2 =====
NUC2: 1H
P2: 1.00
PL2: 0.00
===== CHANNEL f3 =====
NUC3: 13C
P3: 12.00
PL3: 0.00
===== CHANNEL f4 =====
NUC4: 1H
P4: 1.00
PL4: 0.00
F2 - Processing parameters
SI: 32768
SF: 400.1463120 MHz
WDW: EM
SSB: 0
LB: 3.00 Hz
GB: 0
PC: 1.00
```

<sup>13</sup>C NMR Spectra of (2e) (100 MHz, CDCl<sub>3</sub>)

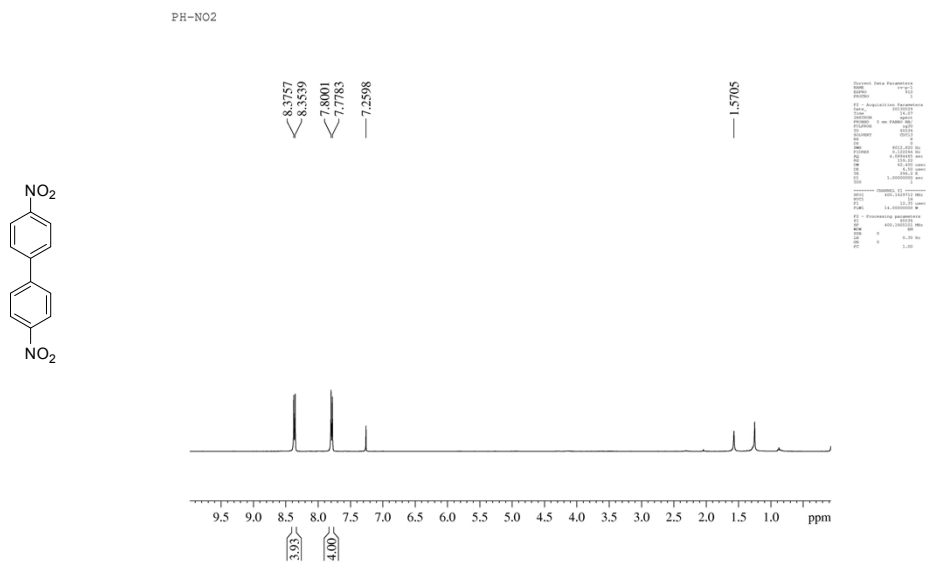

$^1\text{H}$  NMR Spectra of (**2f**) (400 MHz,  $\text{CDCl}_3$ )

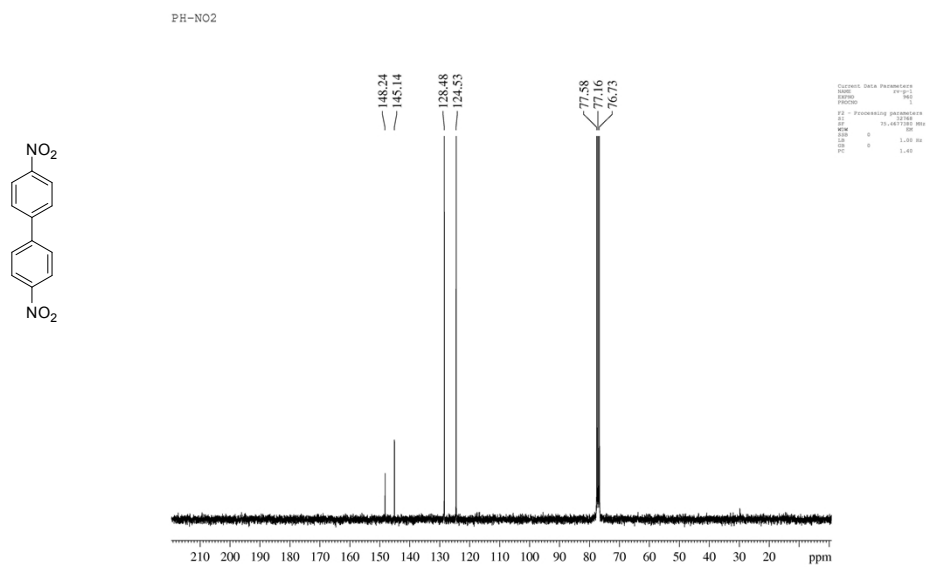

$^{13}\text{C}$  NMR Spectra of (**2f**) (75 MHz,  $\text{CDCl}_3$ )

PH-3,4 diCl

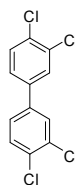

7.6240  
7.6187  
7.5269  
7.5106  
7.5086  
7.3748  
7.3694  
7.3539  
7.3486  
7.2599

1.5434

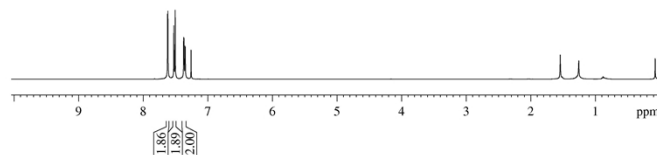

```
Current Data Parameters  
NAME: PH-3,4 diCl  
EXPNO: 1  
PROCNO: 1  
F2 - Acquisition Parameters  
Date_ 2013.12.12  
Time 08.10  
INSTRUM spect  
PROBHD1 5 mm PABBO-1H1  
PULPROG zgpg30  
FREQMHz 400.142  
SFO 400.142  
WDW EM  
SSB 0  
GB 0  
PC 1.00  
AQ 0.12000000  
RG 320  
CZ 1  
SI 0  
SF 400.1420000  
CF 1.0000000  
PR 1.0000000  
DE 0.0000000  
TE 300.2  
FIDRES 0.1500000  
AQRES 0.3000000  
SOLVENT CDCl3  
NS 655  
DS 4  
SWH 6553.820  
F2 - Processing parameters  
SI 0  
SF 400.1420000  
WDW EM  
SSB 0  
GB 0  
PC 1.00  
AQ 0.1200000  
RG 320  
CZ 1  
SI 0  
SF 400.1420000  
CF 1.0000000  
PR 1.0000000  
DE 0.0000000  
TE 300.2  
FIDRES 0.1500000  
AQRES 0.3000000  
SOLVENT CDCl3  
NS 655  
DS 4  
SWH 6553.820
```

<sup>1</sup>H NMR Spectra of (2g) (400 MHz, CDCl<sub>3</sub>)

PH-3,4DICL

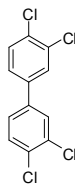

138.87  
133.39  
132.62  
131.11  
128.14  
126.29

77.46  
77.16  
76.84

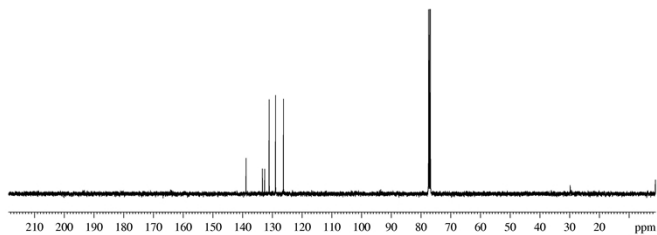

```
Current Data Parameters  
NAME: PH-3,4DICL  
EXPNO: 1  
PROCNO: 1  
F2 - Acquisition Parameters  
Date_ 2013.12.12  
Time 08.10  
INSTRUM spect  
PROBHD1 5 mm PABBO-1H1  
PULPROG zgpg30  
FREQMHz 100.628  
SFO 100.628  
WDW EM  
SSB 0  
GB 0  
PC 1.00  
AQ 0.1200000  
RG 320  
CZ 1  
SI 0  
SF 100.6280000  
CF 1.0000000  
PR 1.0000000  
DE 0.0000000  
TE 300.2  
FIDRES 0.1500000  
AQRES 0.3000000  
SOLVENT CDCl3  
NS 655  
DS 4  
SWH 6553.820  
F2 - Processing parameters  
SI 0  
SF 100.6280000  
WDW EM  
SSB 0  
GB 0  
PC 1.00  
AQ 0.1200000  
RG 320  
CZ 1  
SI 0  
SF 100.6280000  
CF 1.0000000  
PR 1.0000000  
DE 0.0000000  
TE 300.2  
FIDRES 0.1500000  
AQRES 0.3000000  
SOLVENT CDCl3  
NS 655  
DS 4  
SWH 6553.820
```

<sup>13</sup>C NMR Spectra of (2g) (100 MHz, CDCl<sub>3</sub>)

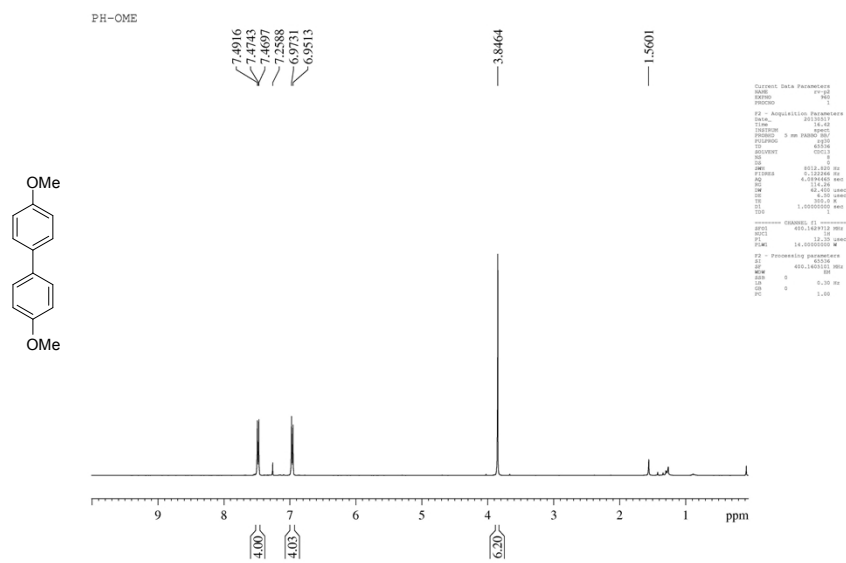

$^1\text{H}$  NMR Spectra of (**2h**) (400 MHz,  $\text{CDCl}_3$ )

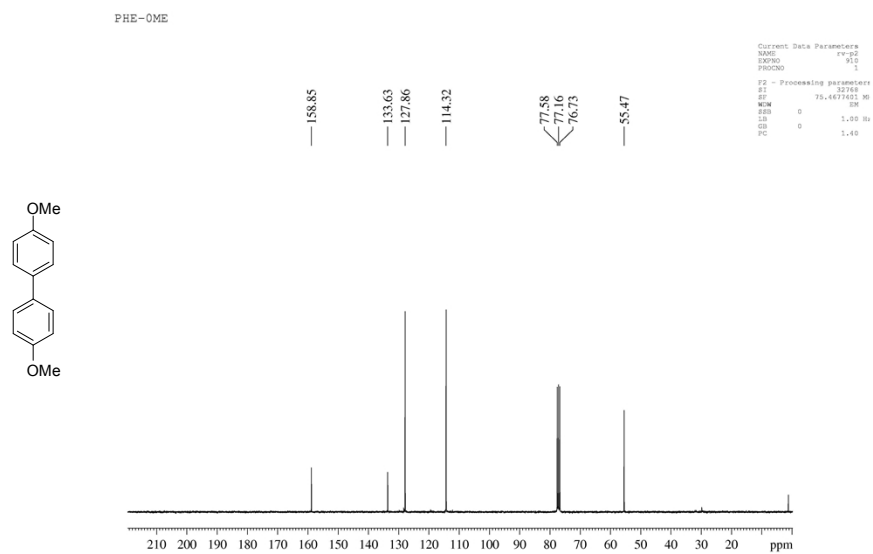

$^{13}\text{C}$  NMR Spectra of (**2h**) (75 MHz,  $\text{CDCl}_3$ )

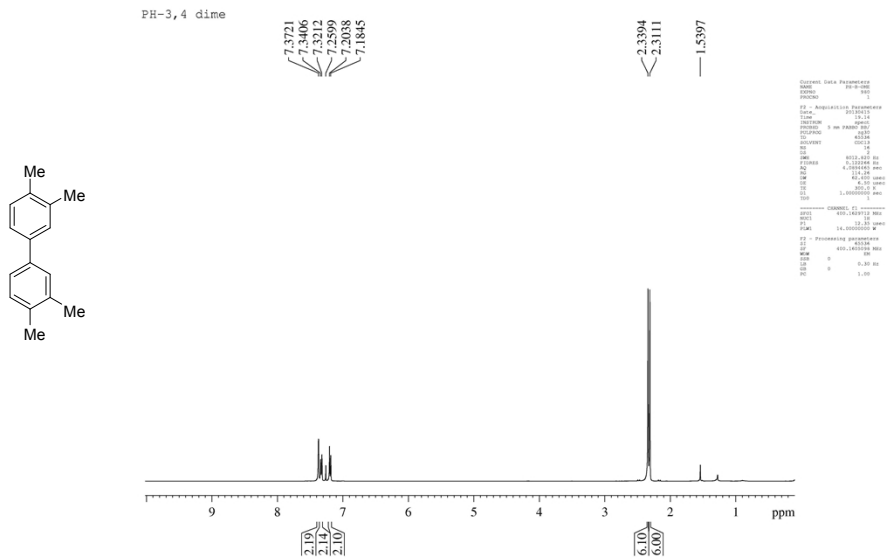

<sup>1</sup>H NMR Spectra of (2i) (400 MHz, CDCl<sub>3</sub>)

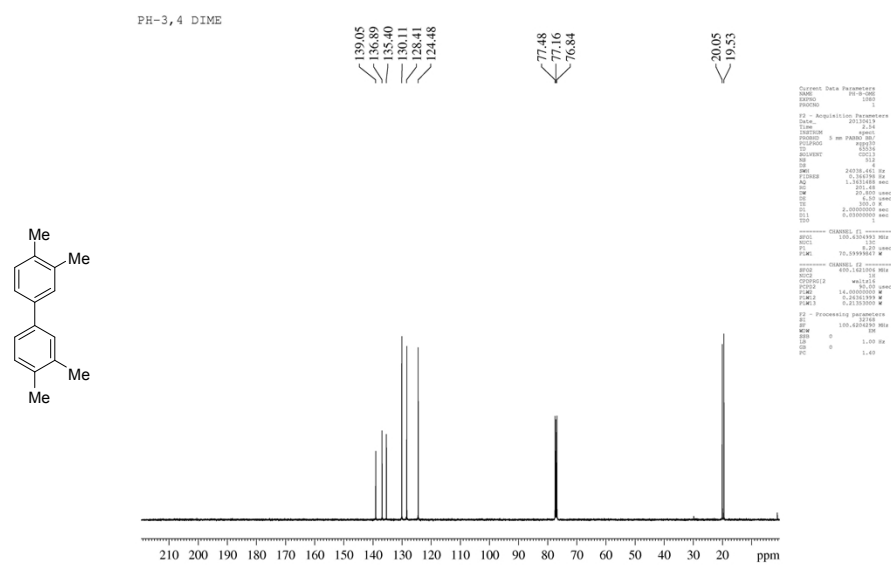

<sup>13</sup>C NMR Spectra of (2i) (100 MHz, CDCl<sub>3</sub>)



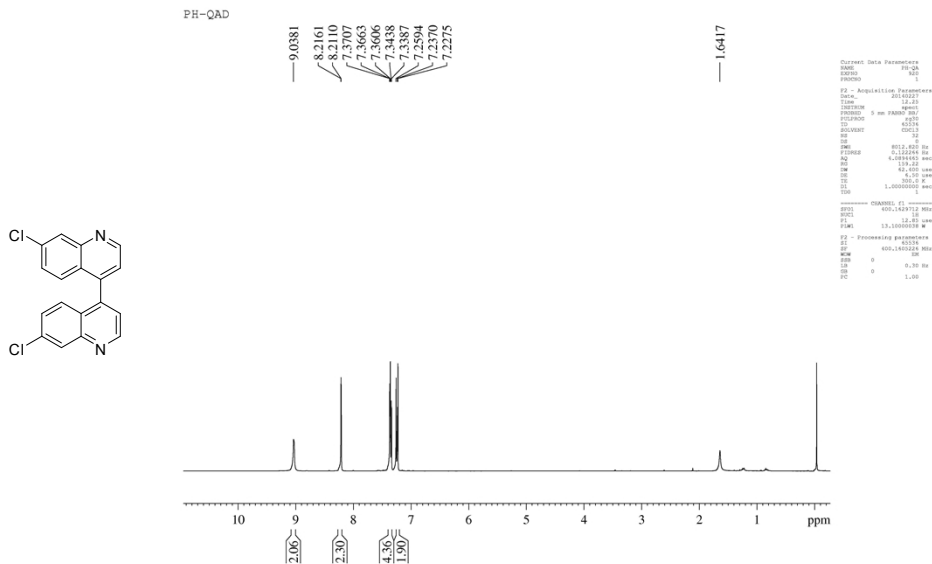

<sup>1</sup>H NMR Spectra of (**2j**) (400 MHz, CDCl<sub>3</sub>)

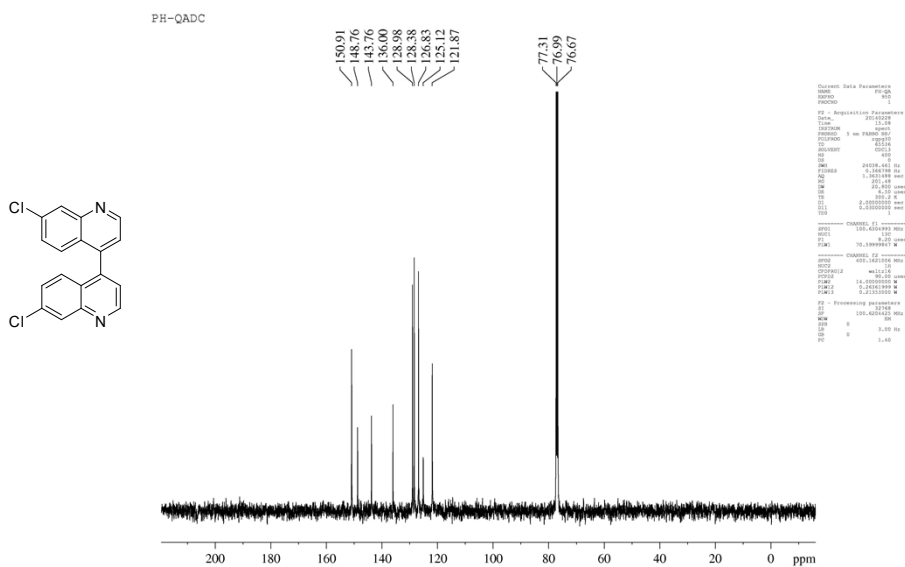

<sup>13</sup>C NMR Spectra of (**2j**) (100 MHz, CDCl<sub>3</sub>)

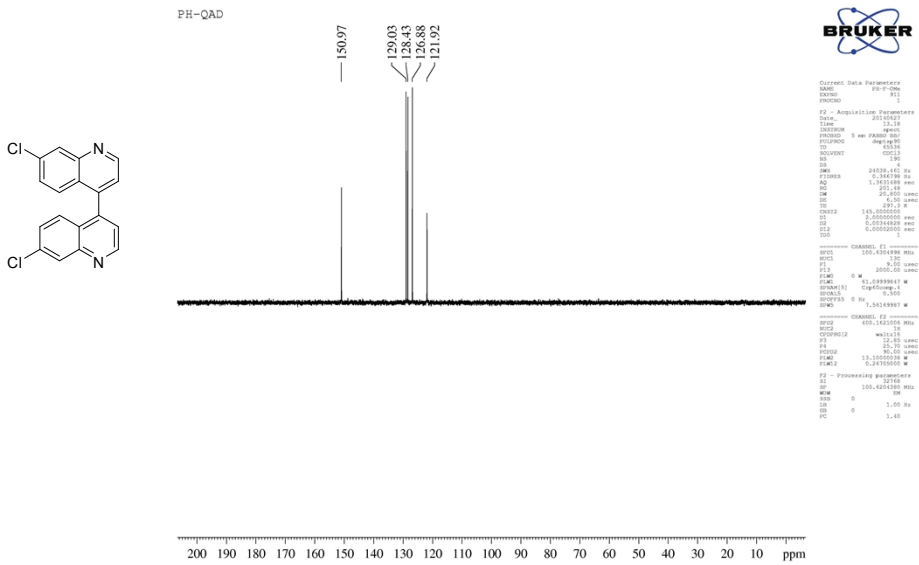

Dept 90° NMR Spectra of **(2j)** (400 MHz, CDCl<sub>3</sub>)

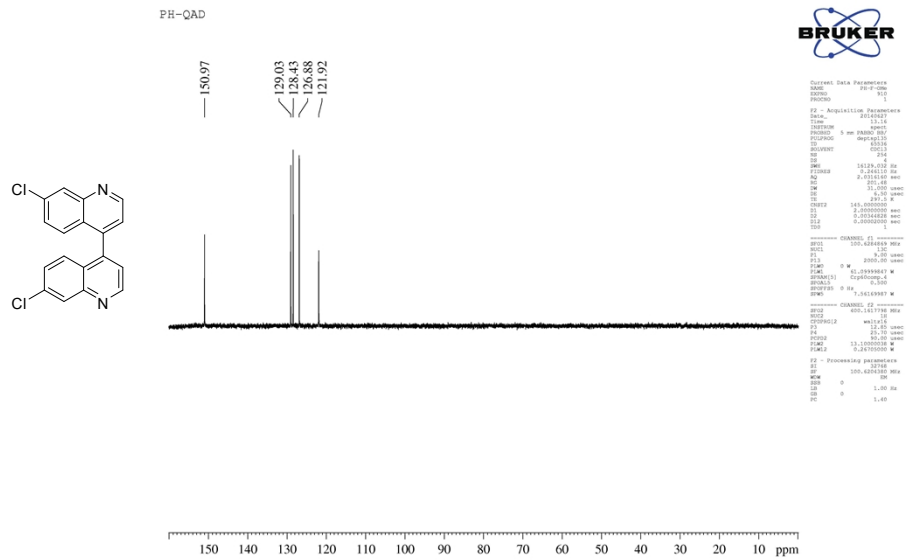

Dept 135° NMR Spectra of **(2j)** (400 MHz, CDCl<sub>3</sub>)



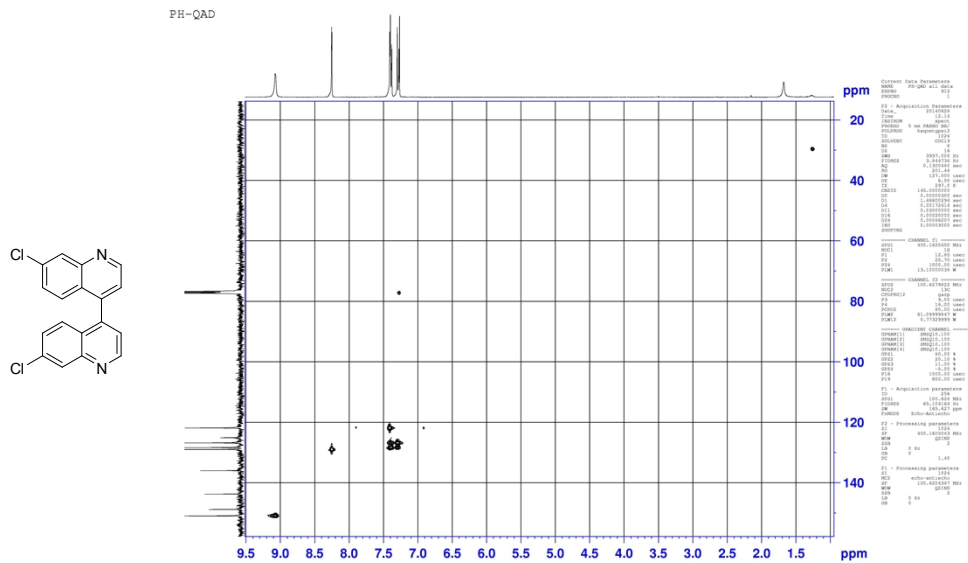

HSQC Spectrum of **(2j)** (400 MHz, CDCl<sub>3</sub>)

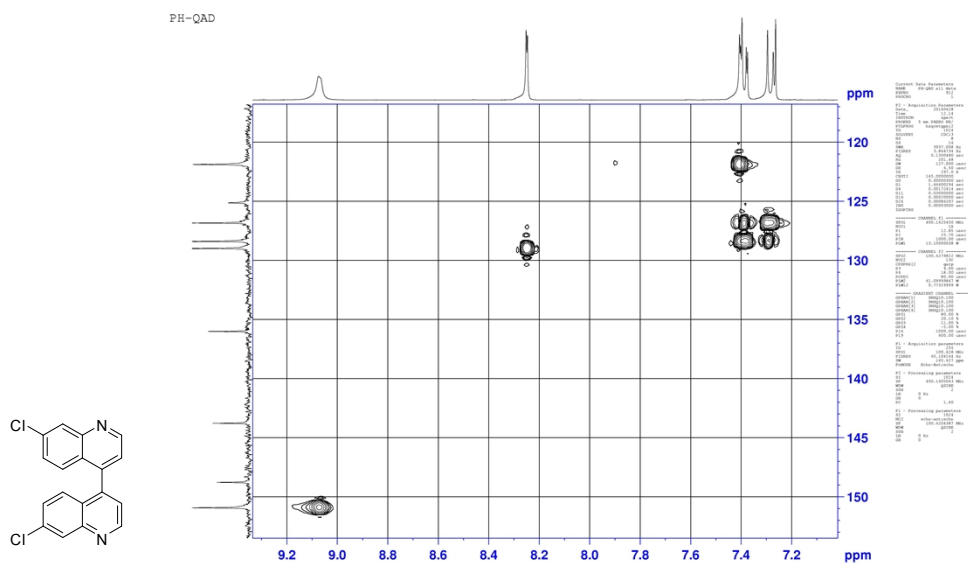

HSQC Spectrum of **(2j)** (400 MHz, CDCl<sub>3</sub>)

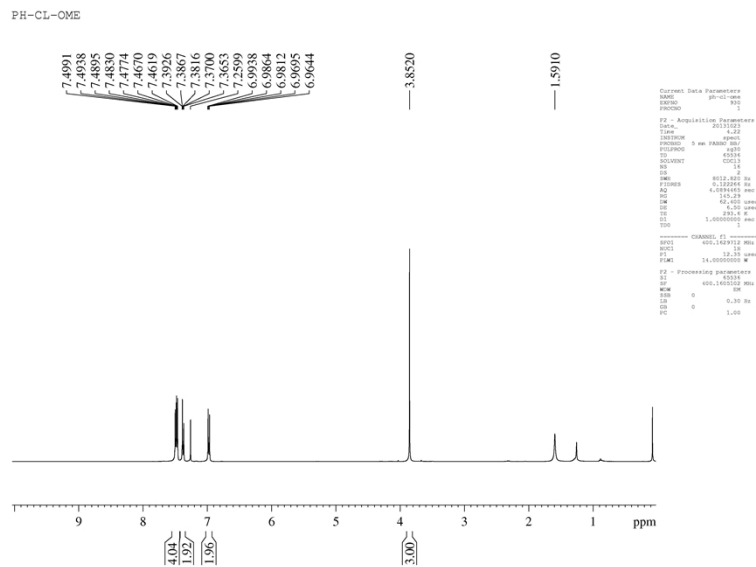

$^1\text{H}$  NMR Spectra of (**3a**) (400 MHz,  $\text{CDCl}_3$ )

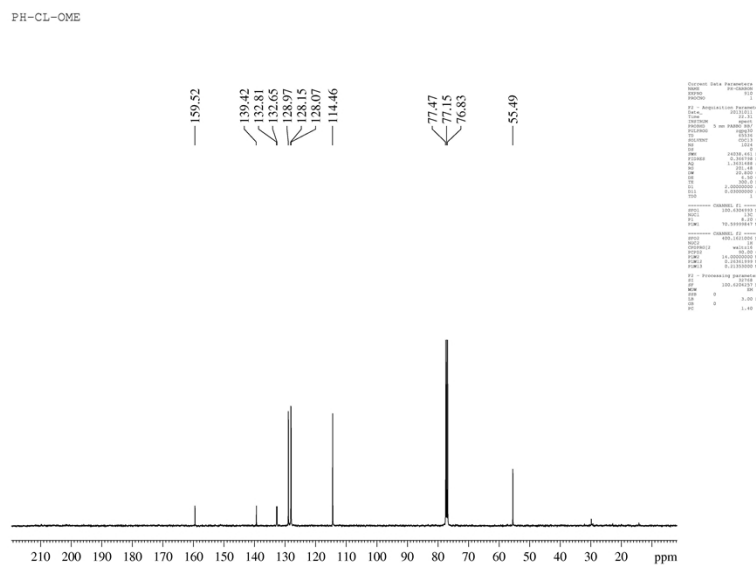

$^{13}\text{C}$  NMR Spectra of (**3a**) (100 MHz,  $\text{CDCl}_3$ )

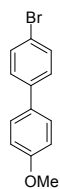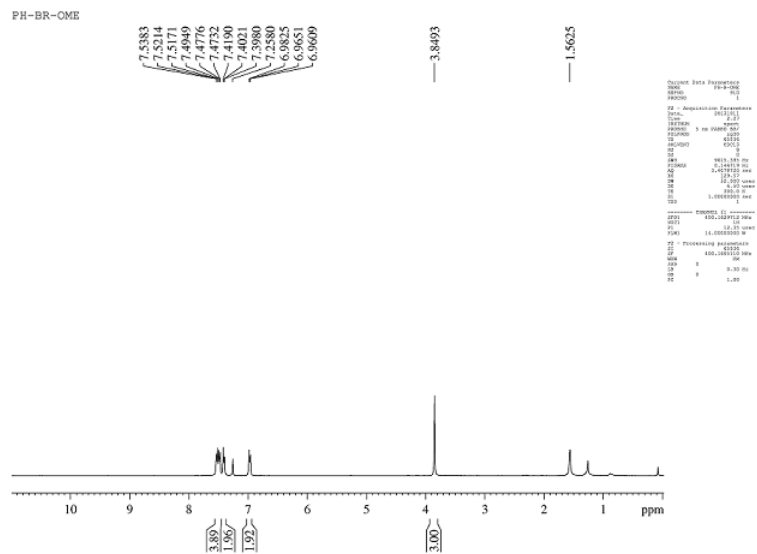

<sup>1</sup>H NMR Spectra of (3b) (400 MHz, CDCl<sub>3</sub>)

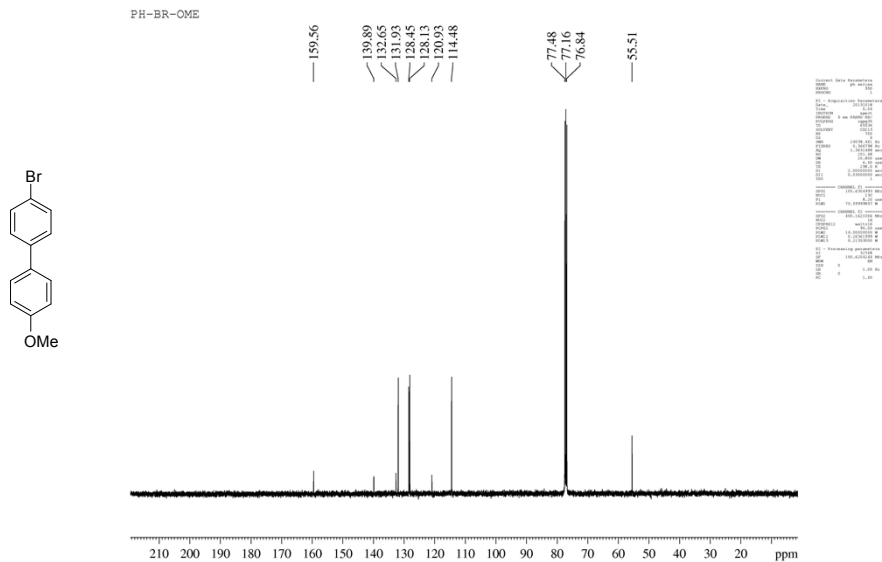

<sup>13</sup>C NMR Spectra of (3b) (100 MHz, CDCl<sub>3</sub>)

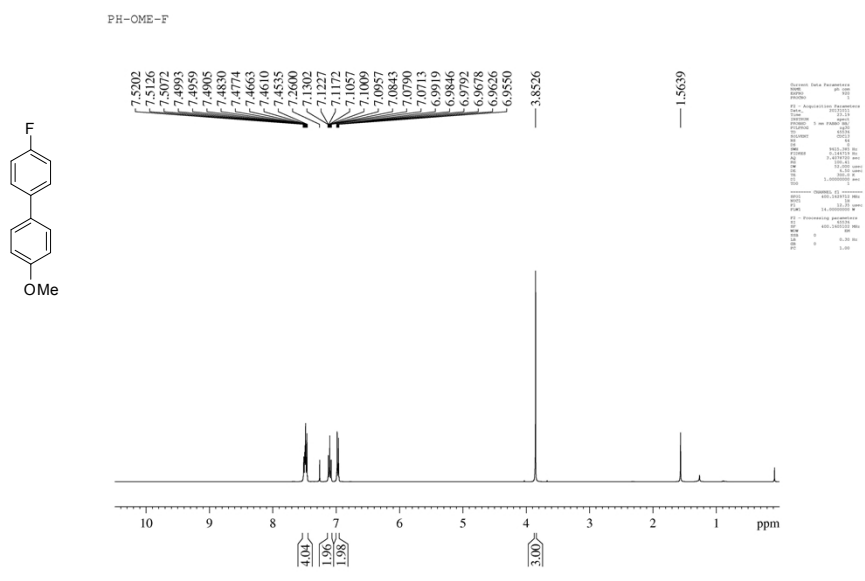

<sup>1</sup>H NMR Spectra of (**3c**) (400 MHz, CDCl<sub>3</sub>)

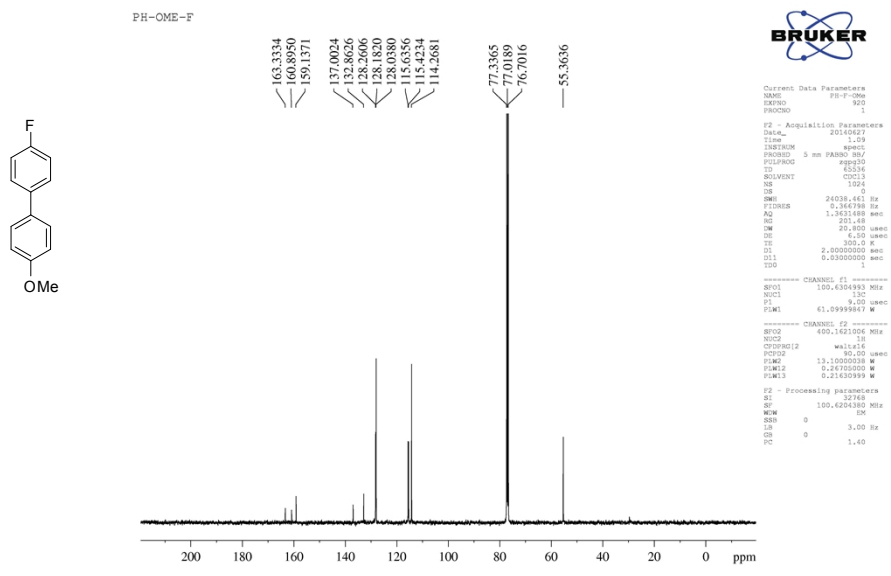

<sup>13</sup>C NMR Spectra of (**3c**) (100 MHz, CDCl<sub>3</sub>)

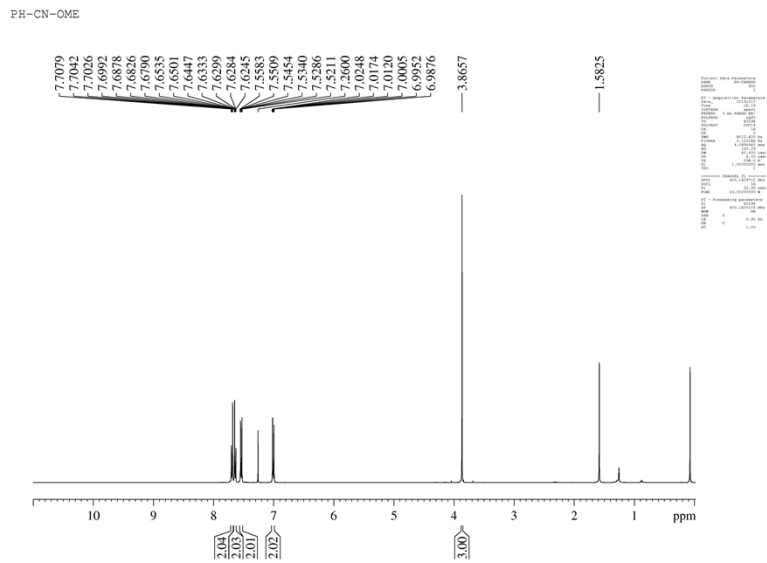

$^1\text{H}$  NMR Spectra of (**3d**) (400 MHz,  $\text{CDCl}_3$ )

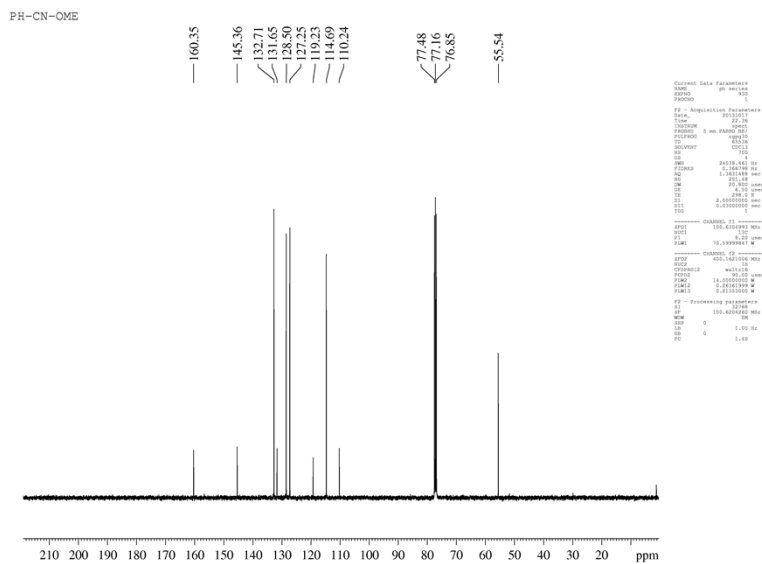

$^{13}\text{C}$  NMR Spectra of (**3d**) (100 MHz,  $\text{CDCl}_3$ )



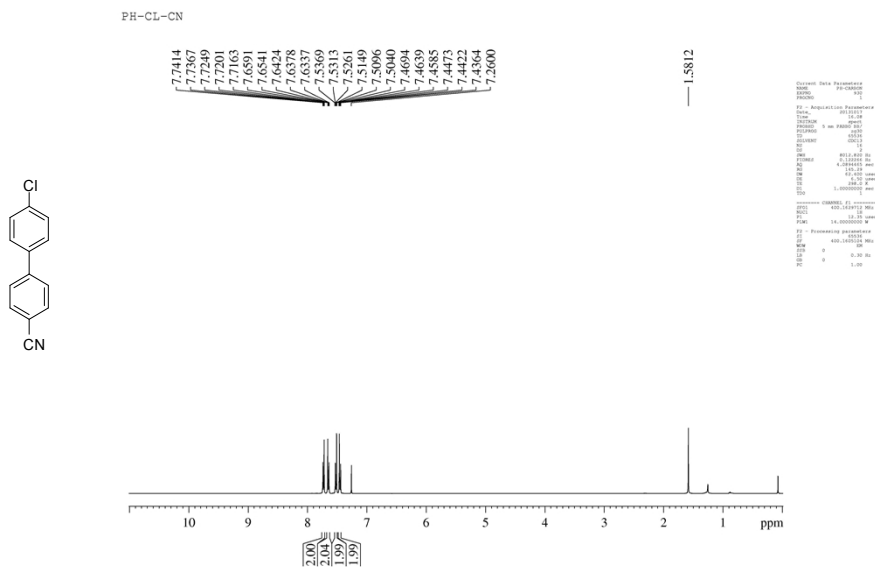

<sup>1</sup>H NMR Spectra of (3e) (400 MHz, CDCl<sub>3</sub>)

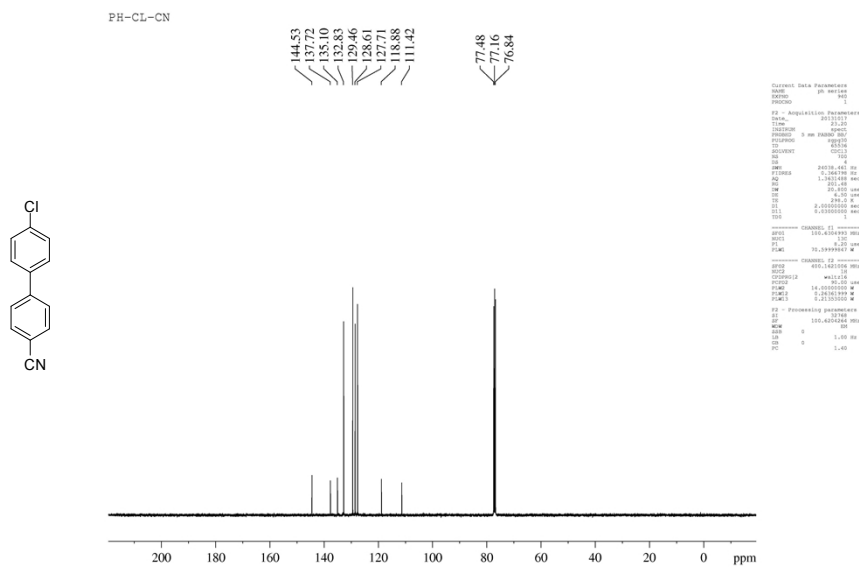

<sup>13</sup>C NMR Spectra of (3e) (100 MHz, CDCl<sub>3</sub>)

PH-CN-BR

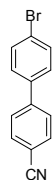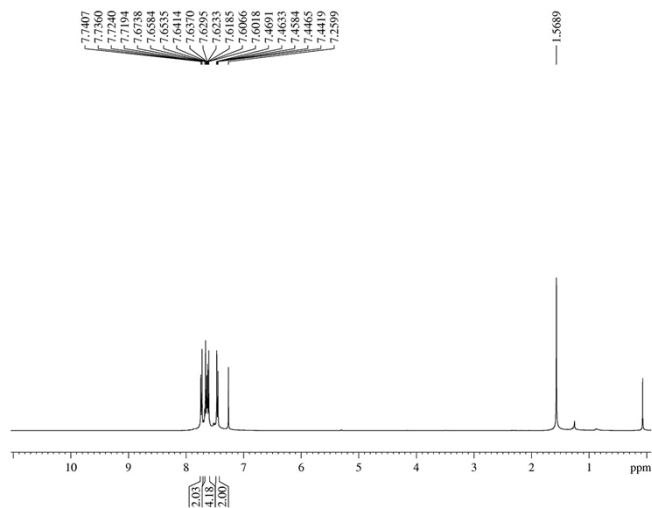

$^1\text{H}$  NMR Spectra of (3f) (400 MHz,  $\text{CDCl}_3$ )

PH-CN-BR

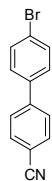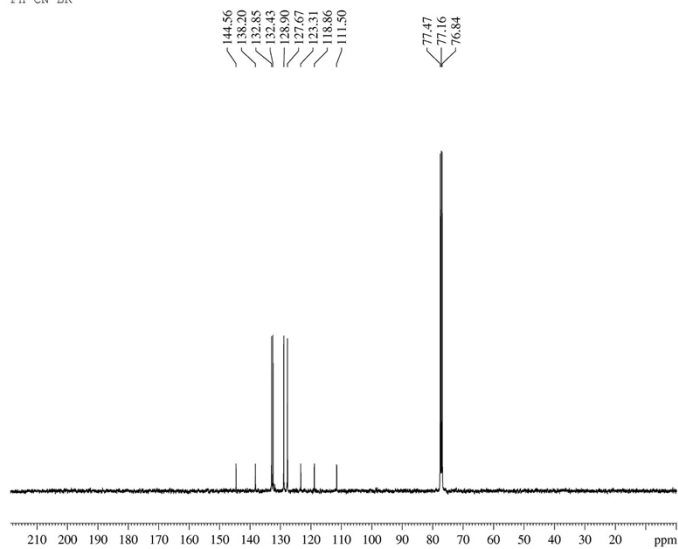

$^{13}\text{C}$  NMR Spectra of (3f) (100 MHz,  $\text{CDCl}_3$ )

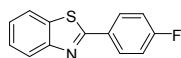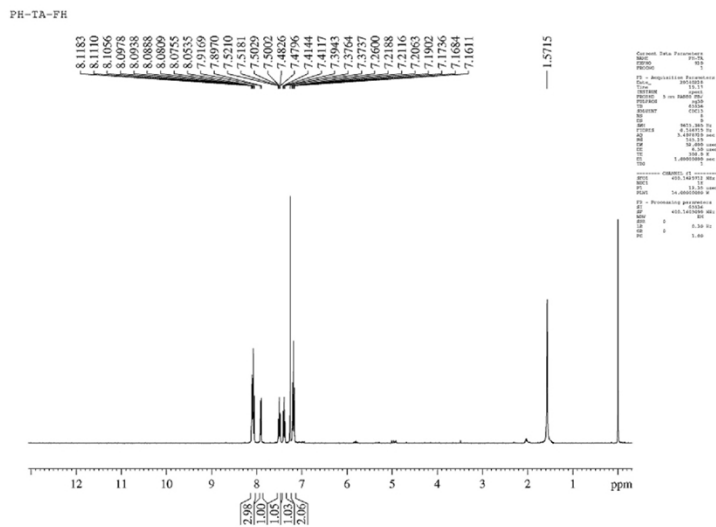

<sup>1</sup>H NMR Spectra of (5) (400 MHz, CDCl<sub>3</sub>)

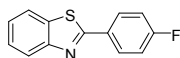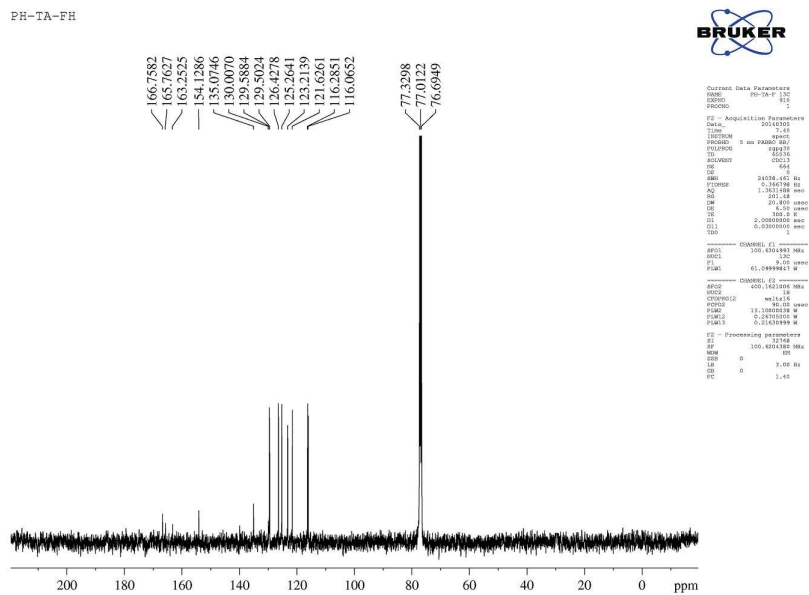

<sup>13</sup>C NMR Spectra of (5) (100 MHz, CDCl<sub>3</sub>)
